# Supplementary material for: Functional Somatic Symptoms and Emotion Regulation in Children and Adolescents
Source: PubMed Central journal article supplement (PMC9667419; doi:10.32872/cpe.4299), 2022-06-30
Supplement: cpe-04-4299-s01.pdf [file cpe-04-4299-s01.pdf]

### Appendix A

Participant characteristics regarding functional somatic symptoms (FSS) and emotion regulation in *Study 1* ( $N = 46$ ) and *Study 2* ( $N = 68$ ).

|                                                             | <i>Study 1</i> |           |              | <i>Study 2</i> |           |              |
|-------------------------------------------------------------|----------------|-----------|--------------|----------------|-----------|--------------|
|                                                             | <i>M</i>       | <i>SD</i> | <i>Range</i> | <i>M</i>       | <i>SD</i> | <i>Range</i> |
| <b>Somatic symptoms</b>                                     |                |           |              |                |           |              |
| Child-reported FSS (SOMS-CA; 0–33*)                         | 5.31           | 5.91      | 0-20         | 6.63           | 4.84      | 0-19         |
| Child-reported pain (SOMS-CA; 0–10)                         | 2.02           | 1.96      | 0-8          | 2.58           | 1.84      | 0-9          |
| Child-reported gastrointestinal symptoms (SOMS-CA; 0–5)     | 0.69           | 1.20      | 0-4          | 1.23           | 1.19      | 0-4          |
| Child-reported cardiorespiratory symptoms (SOMS-CA; 0–5)    | 1.40           | 1.67      | 0-5          | 1.46           | 1.30      | 0-4          |
| Child-reported pseudo-neurological symptoms (SOMS-CA; 0–12) | 1.10           | 1.90      | 0-8          | 1.53           | 1.64      | 0-8          |
| Parent-reported FSS (SOMS-P; 0–33*)                         | 2.57           | 3.26      | 0-14         | 3.58           | 3.52      | 0-22         |
| Parent-reported pain (SOMS-P; 0–10)                         | 1.43           | 1.87      | 0-7          | 1.80           | 1.56      | 0-7          |
| Parent-reported gastrointestinal symptoms (SOMS-P; 0–5)     | 0.35           | 0.85      | 0-4          | 0.76           | 1.07      | 0-4          |
| Parent-reported cardiorespiratory symptoms (SOMS-P; 0–5)    | 0.59           | 0.98      | 0-4          | 0.70           | 0.98      | 0-5          |
| Parent-reported pseudo-neurological symptoms (SOMS-P; 0–12) | 0.20           | 0.54      | 0-3          | 0.30           | 1.07      | 0-8          |
| Parental somatization (BSI; 0–4)                            | -              | -         |              | 0.36           | 0.37      |              |
| <b>Child emotion regulation</b>                             |                |           |              |                |           |              |
| Adaptive emotion regulation (FEEL-KJ; 1–5)                  | 2.96           | 0.67      |              | 2.97           | 0.67      |              |
| Acceptance (FEEL-KJ; 1–5)                                   | 2.86           | 0.85      |              | 3.09           | 0.97      |              |
| Reappraisal (FEEL-KJ; 1–5)                                  | 2.43           | 0.81      |              | 2.49           | 0.87      |              |
| Maladaptive emotion regulation (FEEL-KJ; 1–5)               | 2.34           | 0.61      |              | 2.91           | 0.68      |              |

|                                            |      |      |      |      |
|--------------------------------------------|------|------|------|------|
| Rumination (FEEL-KJ; 1–5)                  | 2.99 | 0.92 | 3.40 | 0.96 |
| Alexithymia (AQC; 0–2)                     | -    | -    | 0.82 | 0.33 |
| <b>Parental emotion regulation</b>         |      |      |      |      |
| Adaptive emotion regulation (CERQ; 1–5)    | 2.91 | 0.73 | 3.11 | 0.63 |
| Acceptance (CERQ; 1–5)                     | 2.91 | 0.98 | 3.27 | 0.95 |
| Reappraisal (CERQ; 1–5)                    | 3.11 | 0.98 | 3.15 | 1.01 |
| Maladaptive emotion regulation (CERQ; 1–5) | 2.06 | 0.50 | 2.35 | 0.58 |
| Rumination (CERQ; 1–5)                     | 2.42 | 0.80 | 2.99 | 0.98 |
| Catastrophization (CERQ; 1–5)              | 1.65 | 0.65 | 2.34 | 0.84 |
| Alexithymia (TAS-20; 1–5)                  | -    | -    | 1.91 | 0.49 |

---

SOMS-CA = Screening for Somatoform Disorders in children and adolescents; SOMS-P = Screening for Somatoform Disorders parent version; BSI = Brief Symptom Inventory; FEEL-KJ = Questionnaire to assess emotion regulation in children and adolescents (Fragebogen zur Erhebung der Emotionsregulation bei Kindern und Jugendlichen); AQC = Alexithymia Questionnaire for children; CERQ = Cognitive Emotion Regulation Questionnaire; TAS-20 = Toronto Alexithymia Scale. \*Item no. 33 “other complaint” only in the total value. The maximum possible range of answers is indicated in brackets behind the questionnaire or subscale.

## Appendix B

Pearson correlations between FSS and emotion regulation in *Study 1* ( $N = 46$ )/*Study 2* ( $N = 68$ )

|                                   | 1                 | 2              | 3          | 4                 | 5              | 6                | 7                 | 8             | 9          | 10                | 11              | 12          | 13 | 14 | 15 | 16 |
|-----------------------------------|-------------------|----------------|------------|-------------------|----------------|------------------|-------------------|---------------|------------|-------------------|-----------------|-------------|----|----|----|----|
| 1. Child FSS (SOMS-CA)            | 1                 |                |            |                   |                |                  |                   |               |            |                   |                 |             |    |    |    |    |
| 2. Child FSS (SOMS-P)             | .27/<br>.51***    | 1              |            |                   |                |                  |                   |               |            |                   |                 |             |    |    |    |    |
| 3. Parental somatization (BSI)    | -/<br>.17         | -/<br>.44***   | 1          |                   |                |                  |                   |               |            |                   |                 |             |    |    |    |    |
| 4. Child adaptive ER (FEEL-KJ)    | -.34*/<br>-.31*   | -.12/<br>-.22  | -/<br>-.17 | 1                 |                |                  |                   |               |            |                   |                 |             |    |    |    |    |
| 5. Child reappraisal (FEEL-KJ)    | <.01/<br>-.20     | -.04/<br>-.19  | -/<br>-.14 | .45**/<br>.65**   | 1              |                  |                   |               |            |                   |                 |             |    |    |    |    |
| 6. Child acceptance (FEEL-KJ)     | -.26/<br>-.36**   | -.20/<br>-.25* | -/<br>-.11 | .79***/<br>.64*** | .29/<br>.43*** | 1                |                   |               |            |                   |                 |             |    |    |    |    |
| 7. Child maladaptive ER (FEEL-KJ) | .53***/<br>.46*** | .08/<br>.16    | -/<br>.22  | -.13/<br>-.32**   | .35*/<br>-.17  | -.02/<br>-.41*** | 1                 |               |            |                   |                 |             |    |    |    |    |
| 8. Child rumination (FEEL-KJ)     | .41**/<br>.17     | .10/<br>.13    | -/<br>.25* | .03/<br>-.13      | .12/<br>-.12   | .16/<br>-.26*    | .81***/<br>.69*** | 1             |            |                   |                 |             |    |    |    |    |
| 9. Child alexithymia (AQC)        | -/<br>.39***      | -/<br>.04      | -/<br>-.14 | -/<br>-.20        | -/<br>-.15     | -/<br>-.26*      | -/<br>.40***      | -/<br>.09     | 1          |                   |                 |             |    |    |    |    |
| 10. Parent adaptive ER (CERQ)     | .02/<br>-.14      | .27/<br>-.17   | -/<br>-.16 | -.24/<br>.20      | -.25<br>.19    | -.22/<br>.13     | -.06/<br>-.28*    | <.01/<br>-.18 | -/<br>-.08 | 1                 |                 |             |    |    |    |    |
| 11. Parent reappraisal (CERQ)     | -.12/<br>.06      | .24/<br>-.01   | -/<br>-.07 | -.09/<br>.17      | -.17/<br>.20   | -.05/<br>.16     | -.26/<br>-.24     | -.14/<br>-.14 | -/<br><.0  | .85***/<br>.78*** | 1               |             |    |    |    |    |
| 12. Parent acceptance (CERQ)      | .14/<br>-.30*     | .22/<br>-.19   | -/<br>-.05 | -.17/<br>.24      | -.22/<br>.19   | -.12/<br>.22     | -.01/<br>-.23     | -.02/<br>-.04 | -/<br>-.02 | .80***/<br>.51*** | .60***/<br>.27* | 1           |    |    |    |    |
| 13. Parent maladaptive ER (CERQ)  | .22/<br>.15       | .37*/<br>.21   | -/<br>.29* | .03/<br>-.08      | .05/<br><.01   | -.01/<br>-.14    | .18/<br>.20       | .18/<br>.37** | -/<br>.18  | .05/<br>.03       | .04/<br>.17     | .05/<br>.12 | 1  |    |    |    |

|                                     |              |               |            |               |               |               |              |                 |           |               |               |               |                   |                   |            |   |
|-------------------------------------|--------------|---------------|------------|---------------|---------------|---------------|--------------|-----------------|-----------|---------------|---------------|---------------|-------------------|-------------------|------------|---|
| 14. Parent catastrophization (CERQ) | .02/<br>.13  | .21/<br>.23   | -/<br>.19  | .03/<br>-.11  | -.05/<br>-.05 | .06/<br>-.11  | .03/<br>.19  | <.01/<br>.36*** | -/<br>.17 | .16/<br>-.25* | .15/<br>-.04  | .29*/<br>-.01 | .78***/<br>.76*** | 1                 |            |   |
| 15. Parent rumination (CERQ)        | .34*/<br>.14 | .37**/<br>.07 | -/<br>.19  | -.04/<br>-.06 | .12/<br><.01  | -.08/<br>-.11 | .34*/<br>.13 | .31*/<br>.34**  | -/<br>.12 | -.03/<br>.16  | -.10/<br>.26* | -.09/<br>.10  | .81***/<br>.77*** | .49***/<br>.39*** | 1          |   |
| 16. Parent Alexithymia (TAS-20)     | -/<br>-.01   | -/<br>.08     | -/<br>.29* | -/<br>-.01    | -/<br>.02     | -/<br>-.06    | -/<br>.13    | -/<br>.15       | -/<br>.17 | -/<br>-.17    | -/<br>-.15    | -/<br>.16     | -/<br>.25*        | -/<br>.35**       | -/<br>-.03 | 1 |

SOMS-CA = Screening for Somatoform Disorders in children and adolescents; SOMS-P = Screening for Somatoform Disorders parent version; BSI = Brief Symptom Inventory; FEEL-KJ = Questionnaire to assess emotion regulation in children and adolescents (Fragebogen zur Erhebung der Emotionsregulation bei Kindern und Jugendlichen; in comparison to Study 1, Study 2 assessed emotion regulation only in response to sadness - not to fear and anger); CERQ = Cognitive Emotion Regulation Questionnaire; AQC = Alexithymia Questionnaire for children; TAS-20 = Toronto Alexithymia Scale. \*\*\*  $p \leq .001$ , \*\*  $p \leq .01$ , \*  $p \leq .05$

### Appendix C

Multiple hierarchical regression analyses for predicting *child-reported FSS* in children and adolescents in *Study 1* ( $N = 46$ ) and *Study 2* ( $N = 68$ ).

| Study 1         |                |                | Study 2          |                |                |
|-----------------|----------------|----------------|------------------|----------------|----------------|
|                 | Coeff.         | <i>p</i>       |                  | Coeff.         | <i>p</i>       |
| <b>Step 1</b>   |                |                |                  |                |                |
| age             | .06            | .72            | age              | .20            | .12            |
| gender          | .04            | .83            | gender           | .19            | .13            |
| $R^2/R^2_{adj}$ | .01/-.05       | .88            | $R^2/R^2_{adj}$  | .09/.06        | .06            |
| $\Delta R^2$    | .01            | .88            |                  | .09            | .06            |
| <b>Step 2</b>   |                |                |                  |                |                |
| age             | .07            | .70            | age              | .18            | .16            |
| gender          | -.02           | .91            | gender           | .18            | .17            |
|                 |                |                | somatization (P) | .11            | .38            |
| adaptive (P)    | .02            | .93            |                  |                |                |
| maladaptive (P) | .21            | .24            |                  |                |                |
| $R^2/R^2_{adj}$ | .05/-.06       | .78            | $R^2/R^2_{adj}$  | .10/.05        | .10            |
| $\Delta R^2$    | .04            | .48            | $\Delta R^2$     | .01            | .38            |
| <b>Step 3</b>   |                |                |                  |                |                |
| age             | -.14           | .38            | age              | .19            | .14            |
| gender          | -.02           | .88            | gender           | .16            | .23            |
|                 |                |                | somatization (P) | .06            | .65            |
| adaptive (P)    | -.07           | .66            | adaptive (P)     | -.12           | .35            |
| maladaptive (P) | .17            | .26            | maladaptive (P)  | .09            | .49            |
| adaptive (C)    | <b>-.30</b>    | <b>.04</b>     |                  |                |                |
| maladaptive (C) | <b>.50</b>     | <b>&lt;.01</b> |                  |                |                |
| $R^2/R^2_{adj}$ | <b>.38/.28</b> | <b>&lt;.01</b> | $R^2/R^2_{adj}$  | .12/.04        | .19            |
| $\Delta R^2$    | <b>.34</b>     | <b>&lt;.01</b> | $\Delta R^2$     | .02            | .53            |
| <b>Step 4</b>   |                |                |                  |                |                |
|                 |                |                | age              | .10            | .43            |
|                 |                |                | gender           | .06            | .65            |
|                 |                |                | somatization (P) | .01            | .97            |
|                 |                |                | adaptive (P)     | -.01           | .94            |
|                 |                |                | maladaptive (P)  | .05            | .71            |
|                 |                |                | adaptive (C)     | -.17           | .20            |
|                 |                |                | maladaptive (C)  | <b>.34</b>     | <b>.02</b>     |
|                 |                |                | $R^2/R^2_{adj}$  | <b>.26/.16</b> | <b>.02</b>     |
|                 |                |                | $\Delta R^2$     | <b>.14</b>     | <b>&lt;.01</b> |

FSS = Functional Somatic Symptoms; Adaptive = adaptive emotion regulation; Maladaptive = maladaptive emotion regulation; P = parent, C = child; significant coefficients are bolded.

## Appendix D

Multiple hierarchical regression analyses for predicting *parent-reported FSS* in children and adolescents in *Study 1* ( $N = 46$ ) and *Study 2* ( $N = 68$ ).

| Study 1         |                |            | Study 2          |                |                |
|-----------------|----------------|------------|------------------|----------------|----------------|
|                 | Coeff.         | <i>p</i>   |                  | Coeff.         | <i>p</i>       |
| <b>Step 1</b>   |                |            |                  |                |                |
| age             | .05            | .78        | age              | .02            | .86            |
| gender          | .00            | .99        | gender           | .12            | .34            |
| $R^2/R^2_{adj}$ | .00/-.05       | .96        | $R^2/R^2_{adj}$  | .02/-.01       | .58            |
| $\Delta R^2$    | .00            | .96        |                  | .02            | .58            |
| <b>Step 2</b>   |                |            |                  |                |                |
| age             | .08            | .62        | age              | -.06           | .64            |
| gender          | -.05           | .77        | gender           | .09            | .47            |
| adaptive (P)    | .28            | .08        | somatization (P) | <b>.44</b>     | <b>&lt;.01</b> |
| maladaptive (P) | <b>.37</b>     | <b>.02</b> |                  |                |                |
| $R^2/R^2_{adj}$ | <b>.22/.14</b> | <b>.05</b> | $R^2/R^2_{adj}$  | <b>.20/.16</b> | <b>&lt;.01</b> |
| $\Delta R^2$    | <b>.22</b>     | <b>.01</b> | $\Delta R^2$     | <b>.18</b>     | <b>&lt;.01</b> |
| <b>Step 3</b>   |                |            |                  |                |                |
| age             | .08            | .63        | age              | -.05           | .70            |
| gender          | -.06           | .74        | gender           | .06            | .60            |
| adaptive (P)    | .26            | .13        | somatization (P) | <b>.40</b>     | <b>&lt;.01</b> |
| maladaptive (P) | <b>.37</b>     | <b>.03</b> | adaptive (P)     | -.10           | .38            |
| adaptive (C)    | -.07           | .64        | maladaptive (P)  | .08            | .53            |
| maladaptive (C) | -.02           | .90        |                  |                |                |
| $R^2/R^2_{adj}$ | .23/.10        | .15        | $R^2/R^2_{adj}$  | <b>.21/.15</b> | <b>.01</b>     |
| $\Delta R^2$    | .01            | .89        | $\Delta R^2$     | .01            | .58            |
| <b>Step 4</b>   |                |            |                  |                |                |
|                 |                |            | age              | -.04           | .77            |
|                 |                |            | gender           | .05            | .69            |
|                 |                |            | somatization (P) | <b>.38</b>     | <b>&lt;.01</b> |
|                 |                |            | adaptive (P)     | -.08           | .50            |
|                 |                |            | maladaptive (P)  | .08            | .54            |
|                 |                |            | adaptive (C)     | -.13           | .32            |
|                 |                |            | maladaptive (C)  | -.01           | .96            |
|                 |                |            | $R^2/R^2_{adj}$  | <b>.23/.13</b> | <b>.03</b>     |
|                 |                |            | $\Delta R^2$     | .01            | .59            |

FSS = Functional Somatic Symptoms; Adaptive = adaptive emotion regulation; Maladaptive = maladaptive emotion regulation; P = parent, C = child; significant coefficients are bolded.
